1 **HIV-PULSE: A long-read sequencing assay for high-throughput near full-length**  
2 **HIV-1 proviral genome characterization**

3 Laurens Lambrechts<sup>1,2</sup>, Noah Bonine<sup>1,2</sup>, Rita Verstraeten<sup>1,2</sup>, Marion Pardons<sup>1</sup>, Ytse  
4 Noppe<sup>1</sup>, Sofie Rutsaert<sup>1</sup>, Filip Van Nieuwerburgh<sup>3</sup>, Wim Van Crielinge<sup>2</sup>, Basiel  
5 Cole<sup>1#</sup>, Linos Vandekerckhove<sup>1,#,\*</sup>

6 **Affiliations**

7 <sup>1</sup>HIV Cure Research Center, Department of Internal Medicine and Pediatrics, Ghent  
8 University Hospital, Ghent University, 9000 Ghent, Belgium.

9 <sup>2</sup>BioBix, Department of Data Analysis and Mathematical Modelling, Faculty of Bioscience  
10 Engineering, Ghent University, 9000 Ghent, Belgium.

11 <sup>3</sup>Laboratory of Pharmaceutical Biotechnology, Faculty of Pharmaceutical Sciences, Ghent  
12 University, 9000 Ghent, Belgium.

13

14 #These authors contributed equally

15 \*Correspondence and requests for materials should be addressed to L.V. (email:  
16 [linos.vandekerckhove@ugent.be](mailto:linos.vandekerckhove@ugent.be))

17

18 **Abstract**

19           A deep understanding of the composition of the HIV-1 reservoir is necessary for the  
20 development of targeted therapies and the evaluation of curative efforts. However, current  
21 near full-length (NFL) HIV-1 proviral genome sequencing assays are based on labor-  
22 intensive and costly principles of repeated PCRs at limiting dilution, restricting their  
23 scalability. To address this, we developed a high-throughput, long-read sequencing assay  
24 called HIV-PULSE (HIV Proviral UMI-mediated Long-read Sequencing). This assay uses  
25 unique molecular identifiers (UMIs) to tag individual HIV-1 genomes, allowing for the  
26 omission of the limiting dilution step and enabling long-range PCR amplification of many NFL  
27 genomes in a single PCR reaction, while simultaneously overcoming poor single-read  
28 accuracy. We optimized the assay using HIV-infected cell lines and then applied it to blood  
29 samples from 18 individuals living with HIV on antiretroviral therapy, yielding a total of 1,308  
30 distinct HIV-1 genomes. Benchmarking against the widely applied Full-Length Individual  
31 Proviral Sequencing assay revealed similar sensitivity (11% vs 18%) and overall good  
32 concordance, though at a significantly higher throughput. In conclusion, HIV-PULSE is a  
33 cost-efficient and scalable assay that allows for the characterization of the HIV-1 proviral  
34 landscape, making it an attractive method to study the HIV-1 reservoir composition and  
35 dynamics.

36                    **Introduction**

37    The establishment of a viral reservoir shortly after HIV-1 infection leads to long-term viral  
38    persistence in people living with HIV-1 (PLWH) (1–3). While antiretroviral therapy (ART) can  
39    successfully suppress viral replication, it is not curative as the viral reservoir is not targeted  
40    (4, 5). Consequently, lifelong adherence to ART is required to prevent viral rebound, which  
41    usually takes place within several weeks following ART cessation (6). Despite the relatively  
42    low frequency of infected CD4 T cells that remain during ART (1/1,000 - 1/10,000), the size  
43    of the viral reservoir is remarkably stable, with an estimated half-life of 44 months (7, 8). The  
44    search for curative interventions targeting the viral reservoir remains one of the top priorities  
45    for achieving HIV-1 remission (9), however, this search is faced with two major challenges:  
46    (i) A lack of knowledge of the mechanisms governing HIV-1 latency and reservoir  
47    maintenance; (ii) A lack of high-throughput methods to measure the efficacy of reservoir-  
48    reducing interventions. To address these problems, technological advances that allow for a  
49    deep and high-throughput reservoir characterization are urgently needed (10).

50    Historically, the qualitative assessment of the HIV-1 reservoir has been carried out using two  
51    main types of assays: (i) Viral outgrowth assays (VOA), in which replication-competent  
52    viruses are reactivated and propagated *ex vivo* at limiting dilution, followed by quantification  
53    and sequencing of the cultured viral genomes (11, 12); (ii) Sequencing-based assays, where  
54    single proviral genomes are PCR-amplified from bulk DNA at limiting dilution, followed by  
55    Sanger- or short-read next-generation sequencing (NGS) (13–19). The VOA-based methods  
56    have the inherent benefit that they focus on replication-competent viruses, though they are  
57    usually long, costly and labor-intensive and have been shown to underestimate the true size  
58    of the replication-competent fraction following one round of reactivation (15). Sequencing-  
59    based methods allow the assessment of a small subgenomic region of interest or the near  
60    full-length (NFL) proviral genome (~90%) (13–19). In the case of the latter, the percentage of  
61    genome-intact proviruses can be derived, which has previously been estimated at 2-5% on  
62    average (16). More recently, several flow-cytometry-based assays have been developed to

63 isolate and study HIV-infected cells harboring an inducible provirus such as Simultaneous  
64 TCR, Integration site and Provirus sequencing (STIP-Seq), which specifically targets the  
65 translation-competent reservoir (20–22). In these assays, the infected cells are dispensed  
66 into single wells of a microtiter plate, followed by genomic or transcriptomic sequencing.

67 A common denominator of the assays described above is that they all rely on the physical  
68 isolation of individual viral genomes into different wells of a microtiter plate, followed by the  
69 PCR amplification of each genome in separate reactions (23). This principle is both labor-  
70 intensive and costly, severely limiting the applicability in large scale projects.

71 Up until the advent of long-read sequencing technologies, long amplicons (>5 kb) were  
72 either sequenced by a series of overlapping Sanger sequencing reactions, or by  
73 fragmentation of the amplicon into smaller pieces followed by short-read NGS (16–18).  
74 Long-read sequencing technologies offer the ability to sequence long amplicons in a single  
75 read, however, these technologies suffer from a high error rate of single-pass reads (~5-  
76 10%) (24). Recently, Karst et al. developed a protocol that uses unique molecular identifiers  
77 (UMIs) to obtain high-accuracy consensus sequences from long amplicons (>5 kb),  
78 overcoming the problem of the limited single-read accuracy (25).

79 Here, we present a new assay that allows for high-throughput amplicon sequencing of NFL  
80 HIV-1 genomes, called HIV-PULSE: HIV Proviral UMI-mediated Long-read Sequencing. By  
81 tagging individual HIV-1 genomes with two distinct UMIs, the step of limiting dilution can be  
82 omitted, enabling the amplification of many NFL genomes in a single reaction (25). After  
83 optimization of the assay on HIV-infected cell lines, we used the protocol to characterize the  
84 viral reservoirs of a chronic cohort of PLWH on ART (n=18). Benchmarking against the  
85 widely used Full-Length Individual Proviral Sequencing (FLIPS) assay revealed comparable  
86 accuracy and efficiency, but a remarkably higher throughput and lower cost per sequenced  
87 NFL HIV-1 genome (17). In conclusion, HIV-PULSE is a valuable addition to the arsenal of  
88 HIV-1 proviral sequencing methods and opens new possibilities for investigating the  
89 composition and dynamics of the HIV-1 reservoir.

## 90 **Materials and Methods**

### 91 **Biological Resources**

#### 92 **Study participants and sample collection**

93 A total of 18 individuals on suppressive ART were included in this study (Supplemental  
94 Table 1). Participants were recruited at Ghent University Hospital and donated blood  
95 samples. Some participants agreed to additional leukapheresis to harvest large amounts of  
96 leukocytes. Peripheral blood mononuclear cells (PBMCs) were isolated by Ficoll density  
97 gradient centrifugation and were cryopreserved in liquid nitrogen. CD4 T cells were isolated  
98 from PBMCs by negative selection using EasySep Human CD4 T Cell Enrichment Kit  
99 (StemCell Technology, #19052). All participants signed informed consent forms approved by  
100 the Ethics Committee of the Ghent University Hospital (Belgium) (Ethics Committee  
101 Registration number: 2015/0894, 2016/0457, BC-07056).

#### 102 **Cell lines**

103 J-Lat 8.4 cells (ARP-9847, contributed by dr. Eric Verdin), a Jurkat-based cell line latently  
104 infected with HIV, and Jurkat E6.1 cells (ARP-177, contributed by dr. Arthur Weiss) were  
105 obtained through the NIH HIV Reagent Program, Division of AIDS, NIAID, NIH (26, 27). J-  
106 Lat and Jurkat cells were grown in RPMI1640 (Gibco, #11875093) supplemented with 10%  
107 fetal bovine serum (HyClone, #RB35947) and 1% Pen/Strep (Gibco, #15140122).

#### 108 **DNA isolation and HIV-1 DNA reservoir size measurement**

109 Genomic DNA from pelleted cells was isolated via column extraction using the DNeasy  
110 Blood & Tissue Kit (Qiagen, #69506) according to the manufacturer's instructions. The DNA  
111 concentration of each extract was measured on a Qubit 3.0 fluorometer using the Qubit  
112 dsDNA BR assay kit (ThermoFisher Scientific, #Q32853). The HIV-1 copy number was  
113 determined by a total HIV-1 DNA assay on droplet digital PCR (Bio-Rad, QX200 system), as  
114 described previously (28). PCR amplification was carried out with the following cycling  
115 program: 10 m at 95°C; 40 cycles (30 s at 95°C, 1 m at 56°C); 10 m at 98°C. Droplets were

116 read on a QX200 droplet reader (Bio-Rad). Analysis was performed using ddpcRquant  
117 software (29).

### 118 **Full-length individual proviral sequencing**

119 The full-length individual proviral sequencing (FLIPS) assay was performed as described by  
120 Hiener et al. (17). A detailed protocol can be found on the following link:  
121 [dx.doi.org/10.3791/58016](https://dx.doi.org/10.3791/58016). In short, genomic DNA was used as input for a nested PCR  
122 performed at an endpoint dilution where <30% of the reactions are positive. The cycling  
123 conditions were 94°C for 2 m; then 94°C for 30 s, 64°C for 30 s, 68°C for 10 m for 3 cycles;  
124 94°C for 30 s, 61°C for 30 s, 68°C for 10 m for 3 cycles; 94°C for 30 s, 58°C for 30 s, 68°C  
125 for 10 m for 3 cycles; 94°C for 30 s, 55°C for 30 s, 68°C for 10 m for 21 cycles; then 68°C for  
126 10 m. For the second round, 10 extra cycles at 55°C were included. The PCR products were  
127 visualized using agarose gel electrophoresis (1% agarose gel). Proviral amplicons from  
128 positive wells were cleaned using AMPure XP beads (Beckman Coulter, #A63880), followed  
129 by a quantification of each cleaned provirus with Quant-iT PicoGreen dsDNA Assay Kit  
130 (Invitrogen, #P11496).

### 131 **Illumina short-read sequencing**

132 Selected FLIPS proviral amplicons underwent NGS library preparation using the Nextera XT  
133 DNA Library Preparation Kit (Illumina, #FC-131-1096) with indexing of 96-samples per run  
134 according to the manufacturer's instructions (Illumina, #FC-131-2001), except that input and  
135 reagents volumes were halved and libraries were normalized manually. The pooled library  
136 was sequenced on a MiSeq Illumina platform via 2x150 nt paired-end sequencing using the  
137 300 cycle v2 kit (Illumina, #MS-102-2002).

### 138 **HIV-PULSE assay methodology**

#### 139 *Pre-amplification*

140 A first PCR was used to specifically target and pre-amplify HIV-1 proviral templates using the  
141 outer primers of a nested HIV-1 primer set (listed in Supplemental Table 2, Figure 1A). Each  
142 PCR reaction contained 500 ng of genomic DNA, 2 µL LongAmp Taq DNA Polymerase

143 (NEB, # M0323L), 0.5  $\mu$ M of each primer (First PCR F, First PCR R), 1.5  $\mu$ L 10 mM dNTPs  
144 (Promega, #C1141), 10  $\mu$ L 5X LongAmp Taq Reaction Buffer in 50  $\mu$ L. The following cycling  
145 conditions were used: 94°C for 1 m 15 s; then 94°C for 30 s, 63°C for 30 s, 65°C for 10 m for  
146 6 cycles; then 65°C for 10 m. The number of amplification cycles can be reduced to 5 cycles  
147 for samples from individuals with a high reservoir size (>2,500 total HIV-1 DNA  
148 copies/million CD4) to prevent overbinning. PCR products were cleaned using CleanPCR  
149 magnetic beads (CleanNA, #CPCR-0050) at a 1.0x beads/sample ratio.

#### 150 *Tagging HIV-1 templates*

151 A second PCR was performed to tag both ends of the pre-amplified proviral HIV-1 templates  
152 with a tailed UMI (listed in Supplemental Table 2). Primers were designed to contain: (i) a  
153 synthetic primer binding site used in later stages for amplification, (ii) a UMI with a repetitive  
154 pattern of 12 random nucleotides and 6 degenerate nucleotides (Y/R) and (iii) an HIV-1 inner  
155 primer of the nested primer set to target the pre-amplified templates (Figure 1A,  
156 Supplemental Figure 1A). Each PCR reaction contained all the cleaned pre-amplified  
157 product (30  $\mu$ L), 2  $\mu$ L LongAmp Taq DNA Polymerase (NEB, # M0323L), 0.5  $\mu$ M of each  
158 primer (Second PCR F UMI, Second PCR R UMI), 1.5  $\mu$ L 10 mM dNTPs (Promega,  
159 #C1141), 10  $\mu$ L 5X LongAmp Taq Reaction Buffer in 50  $\mu$ L. The following cycling conditions  
160 were used: 94°C for 1 m 15 s; then 94°C for 30 s, 58°C for 30 s, 65°C for 10 m for 2 cycles;  
161 then 65°C for 10 m. Tagged PCR products were cleaned using CleanPCR magnetic beads  
162 (CleanNA, #CPCR-0050) in a custom buffer solution (based on the 'SPRI size selection  
163 protocol for >1.5–2 kb DNA fragments' protocol provided by Oxford Nanopore Technologies  
164 (ONT)) at a 0.9x beads/sample ratio and eluted in 30  $\mu$ L nuclease-free water (NFW).

#### 165 *Amplification of UMI-tagged proviruses*

166 The next steps used 4 consecutive PCR amplification rounds of each 10 cycles followed by  
167 a clean up to produce enough template input required for long-read sequencing while  
168 preserving amplicon size distributions. Here, we made use of a primer set that binds to the

169 synthetic binding site incorporated during the previous tagging stage. The PCR mix consists  
170 of 2  $\mu$ L LongAmp Taq DNA Polymerase (NEB, # M0323L), 0.5  $\mu$ M of each primer  
171 (ncec\_pcr\_fw\_v7, ncec\_pcr\_rv\_v7), 1.5  $\mu$ L 10 mM dNTPs (Promega, #C1141), 10  $\mu$ L 5X  
172 LongAmp Taq Reaction Buffer in 50  $\mu$ L. For the first PCR amplification round all the cleaned  
173 tagging products from the previous step (30  $\mu$ L) were used as template input while during  
174 the second, third and fourth amplification rounds only a third of the cleaned product of the  
175 previous round is used (10  $\mu$ L). The following cycling conditions were used: 94°C for 1 m 15  
176 s; then 94°C for 30 s, 58°C for 30 s, 65°C for 10 m for 2 cycles; then 65°C for 10 m. PCR  
177 products were cleaned after each consecutive round using regular CleanPCR magnetic  
178 beads (CleanNA, #CPCR-0050) at a 1.0x beads/sample ratio and eluted in 30  $\mu$ L NFW.  
179 During the last round of 10 cycles, the regular primers were switched for a custom set of  
180 tailed primers to barcode the PCR products from the same participant with a specific,  
181 identical identifier (listed in Supplemental Table S2). After the last PCR round, the end  
182 products were visualized using agarose gel electrophoresis (1% agarose gel) and the DNA  
183 concentration was determined using a Qubit 3.0 fluorometer with the Qubit dsDNA BR assay  
184 kit (ThermoFisher Scientific, #Q32853).

### 185 **ONT long-read sequencing**

186 Samples were multiplexed using the Native Barcoding Kit (ONT, #EXP-NBD104) using the  
187 following strategy: each PCR replicate was assigned to a different ONT barcode and  
188 contained equimolarly pooled PCR products from different participants. In later stages, this  
189 allows to assign reads to the correct PCR replicate by the ligated ONT barcode and to the  
190 correct sample by the participant-specific identifier attached during the last PCR round  
191 (Supplemental Figure 1A). For library preparation, the Ligation Sequencing Kit (ONT, #SQK-  
192 LSK109) was used following the manufacturer's instructions. Samples were sequenced on a  
193 MinION ONT device using MinION R10.3 flow cells and the MinKNOW v21.02.1 software  
194 followed by basecalling at super accuracy mode and demultiplexing with Guppy v5.0.17.

### 195 **Bioinformatics analysis of long-read data**



196 For the analysis of long-read data, a customized version of the UMI data analysis workflow  
197 as described by Karst et al. was utilized (Supplemental Figure 1B) (25). The adapted scripts  
198 can be found at [https://github.com/laulambbr/longread\\_umi\\_hiv](https://github.com/laulambbr/longread_umi_hiv), main changes include  
199 updated software versions of samtools (1.11), medaka (1.4.3) and racon (1.4.20). Before the  
200 data was analyzed using the UMI pipeline, the demultiplexed ONT reads were first mapped  
201 against the HXB2 reference sequence using minimap2 (2.17) to filter out non-HIV-1 reads.  
202 Next, the '*longread\_umi nanopore\_pipeline*' workflow was run separately on each replicate  
203 read dataset using the following settings: `-s 200 -e 200 -m 1500 -M 10000 -f`  
204 `CAAGCAGAAGACGGCATAACGAGAT -F AAGTAGTGTGTGCCCGTCTGTTGTGTGAC -r`  
205 `AATGATACGGCGACCACCGAGATC -R GGAAAGTCCCCAGCGGAAAGTCCCTTGTAG -c`  
206 `3 -p 1 -q r103_hac_g507 -U 'r103_min_high_g360'`. The workflow consists of the following  
207 consecutive steps; (i) trimming and filtering of the HIV-1 long-read sequencing data using  
208 Porechop (v.0.2.4, <https://github.com/rrwick/Porechop>), Filtlong (v.0.2.0,  
209 <https://github.com/rrwick/Filtlong>) and cutadapt (v.2.7) (30), (ii) extraction of UMI reference  
210 sequences using cutadapt (v.2.7) and usearch (30, 31), (iii) binning of reads to UMI  
211 combinations using bwa (v0.7.17) and samtools (v1.11) while excluding chimeric artifacts,  
212 (iv) generation of bin consensus sequences using usearch and minimap2 (v2.17) (31, 32)  
213 and (v) polishing of bin consensus data by multiple rounds of racon (v.1.4.20) and a final  
214 round of Medaka (v.1.4.3, <https://github.com/nanoporetech/medaka>) (33).

215 Next, a custom bioinformatics workflow specific to the HIV-PULSE protocol was run to  
216 correct for pre-amplification, improve final consensus accuracy and evaluate clonality among  
217 PCR replicates. First, the polished bin consensus sequences from each replicate dataset  
218 were demultiplexed to their respective participant using the '*longread\_umi demultiplex*'  
219 workflow. For each participant, bin consensus sequences from all PCR replicates were  
220 pooled together and screened for the occurrence of identical UMIs. Identical UMI pairs in  
221 different PCR replicates are technically not possible but these artifacts may arise due to  
222 misassignment during the initial raw ONT reads demultiplexing by Guppy. In these cases,

223 the bin in the replicate with the highest coverage was considered correct while the others  
224 were removed from their respective replicate datasets. As the assay relies on a pre-  
225 amplification phase, single proviral templates will have been amplified and potentially tagged  
226 into bins with different UMI pairs. This prohibits the screening for clonal proviruses present in  
227 one bulk PCR reaction as pre-amplification would also lead to the presence of identical  
228 proviruses in bins with different UMI pairs. To correct for this, identical proviruses (due to  
229 clonality or pre-amplification) present in the bin consensus sequences from each participant  
230 were identified by clustering genomes with similar sizes and >99.5 % sequence identity into  
231 a megabin using usearch (31). For megabins consisting of >3 bins, a new consensus  
232 sequence was constructed to help to resolve remaining errors. For megabins that only  
233 consisted of 2 bin consensus sequences, the bin with the highest coverage (~accuracy) was  
234 retained while bins that did not cluster remained as unique bins. Finally, an assessment of  
235 clonality among different PCR replicates was made by screening the resulting megabins for  
236 the presence of bin sequences originating from different PCR replicates. If the same proviral  
237 sequence was found in multiple PCR replicates, it is considered as evidence of a potential  
238 clonal origin, as opposed to proviruses that are only found in one replicate. By performing  
239 multiple PCR replicates, one can identify clonal populations, however, accurate  
240 quantification of reservoir clonality is hindered by the fact that identical proviruses found  
241 within the same PCR replicate are collapsed and counted as one (to exclude potential bias  
242 by pre-amplification).

### 243 **Bioinformatics analysis of Illumina data**

244 NFL genome sequences derived from FLIPS reactions were de novo assembled as follows:  
245 (i) FASTQ quality checks were performed with FastQC v0.11.7  
246 (<http://www.bioinformatics.babraham.ac.uk/projects/fastqc>) and removal of Illumina adaptor  
247 sequences and quality-trimming of 5' and 3' terminal ends was performed with bbmap  
248 v37.99 (<https://sourceforge.net/projects/bbmap/>). (ii) Trimmed reads were de novo  
249 assembled using MEGAHIT v1.2.9 with standard settings (34). (iii) Resulting contigs were

250 aligned against the HXB2 HIV-1 reference genome using blastn v2.7.1 with standard  
251 settings, and contigs that matched HXB2 were retained (35). (iv) Trimmed reads were  
252 mapped against the *de novo* assembled HIV-1 contigs to generate final consensus  
253 sequences based on per-base majority consensus calling, using bbmap v37.99  
254 (<https://sourceforge.net/projects/bbmap/>). Scripts concerning *de novo* assembly of HIV-1  
255 genomes can be found at the following GitHub page:  
256 [https://github.com/laulambr/virus\\_assembly](https://github.com/laulambr/virus_assembly).

### 257 **HIV-1 genome classification**

258 NFL proviral genome classification was performed using the publicly available “Gene Cutter”  
259 and “Hypermut” webtools from the Los Alamos National Laboratory HIV sequence database  
260 (<https://www.hiv.lanl.gov>). Proviral genomes were classified in the following sequential order:  
261 (i) “Inversion”: presence of internal sequence inversion, defined as region of reverse  
262 complementarity. (ii) “Large internal deletion”: internal sequence deletion of >1000 bp. (iii)  
263 “Hypermutated”: APOBEC-3G/3F-induced hypermutation. (iv) “packaging signal and/or  
264 major splice donor (PSI/MSD) defect”: deletion >7 bp covering (part of) the packaging  
265 signal region or absence of GT dinucleotide at the MSD and GT dinucleotide at the cryptic  
266 donor site (located 4 bp downstream of MSD) (19). Proviruses with a deletion covering  
267 PSI/MSD that extended into the *gag* gene, thereby removing the *gag* AUG start codon, were  
268 also classified into this category. (v) “Premature stop-codon/frameshift”: premature stop-  
269 codon or frameshift caused by mutation and/or sequence insertion/deletion in the essential  
270 genes *gag*, *pol* or *env*. Proviruses with insertion/deletion >49 nt in *gag*, insertion/deletion  
271 >49 nt in *pol*, or insertion/deletion >99 nt in *env* were also classified into this category. (vi)  
272 “Intact”: proviruses that displayed none of the above defects were classified into this  
273 category.

### 274 **Reference sequences**

275 Proviral HIV-1 genomes from participants previously acquired with the FLIPS and STIP-Seq  
276 assays in the context of former studies were included as references (20). Accuracy metrics  
277 on the new HIV-PULSE assay compared to FLIPS and STIP-Seq reference proviruses  
278 (sequenced using Illumina technology) were calculated using pomoxis (v0.3.6,  
279 <https://github.com/nanoporetech/pomoxis>).

## 280 **Phylogenetic analysis**

281 Sequences obtained with the HIV-PULSE assay, STIP-Seq and FLIPS were multiple aligned  
282 using MAFFT (v 7.471) (36). DIVEIN was used to calculate pairwise diversity among proviral  
283 sequences (37). Phylogenetic trees were constructed using PhyML v3.0 (best of NNI and  
284 SPR rearrangements) and 1,000 bootstraps (38). R (v4.1.2), ggplot (v3.3.5) and ggtree  
285 (v3.2.1) were used for visualization and annotation of trees (39–41).

286 **Results**

287 **Optimization of PCR cycling conditions on HIV-infected cell lines**

288 Since the frequency of HIV-1 infected cells in ART-suppressed PLWH is remarkably low,  
289 typically in the range of 100-1,000 proviral genomes per million CD4 T cells, we set out to  
290 devise an assay allowing for the detection of such rare events using a UMI-binning strategy  
291 (Figure 1A) (7). By including a pre-amplification step, the sensitivity of the assay should  
292 considerably improve as more target templates are created, thus increasing the number of  
293 tagged templates transferred to the PCR amplification step. This hypothesis was tested by  
294 preparing a dilution series of J-Lat 8.4 DNA (HIV-infected CD4 T cell line) in Jurkat DNA  
295 (non-infected parental CD4 T cell line). The dilution series, ranging from 100% to 0.01% J-  
296 Lat 8.4 DNA (Jurkat as negative control), was subjected to either 0, 2, 4, 6 or 8 cycles of pre-  
297 amplification, using primers that target NFL HIV-1 (Figure 1B). Each amplification was  
298 performed in triplicate, using a fixed input of 500 ng genomic DNA (corresponding with  
299 ~82,500 CD4 T cells) with the PCR success being determined by visualization of the ~9.5 kb  
300 amplicon by agarose gel electrophoresis. As expected, reactions with an input of undiluted J-  
301 Lat DNA were all successful regardless of the number of pre-amplification cycles (Figure  
302 1B). However, in samples with a proviral burden closer to those observed in samples from  
303 PLWH (~0.1%) at least 6 cycles of pre-amplification were required for guaranteed PCR  
304 success.

305 Next, we set out to determine whether high-accuracy HIV-1 genomes could be acquired by  
306 performing long-read sequencing of the J-Lat 8.4 PCR products and subsequent analysis  
307 using a custom version of the UMI pipeline developed by Karst et al. (25). Using an ONT  
308 R10.3 flow cell, reads with a median length of 9.5 kb were generated, in agreement with the  
309 expected amplicon length of J-Lat 8.4 DNA (Supplemental Figure 1C-H). The bioinformatics  
310 pipeline allowed for the construction of the UMI-tagged proviruses by binning the reads  
311 based on the observed terminal UMI pairs in the sequencing data (Figure 1A). During these  
312 steps, non-HIV reads were filtered out (removing non-specific amplicons) and aberrant UMI

313 bins not meeting a fixed list of criteria (e.g. chimeras, read orientation bias) were excluded  
314 (Supplemental Figure 1B-H, for LIB01 (sequencing library containing the J-Lat 8.4 amplicon  
315 reads) ~30% of all detected UMI pairs did not meet the criteria, however, they accounted  
316 only for 16% of all the binned reads). For each bin, a consensus sequence was constructed  
317 by multiple rounds of polishing (racon, medaka) of the assigned raw reads. To assess the  
318 accuracy of the proviral UMI consensus sequences, we compared each bin to a reference  
319 genome of the J-Lat 8.4 amplicon sequenced with Illumina. As more reads were assigned to  
320 a bin, an increase in the mean accuracy could be observed before reaching a plateau at  
321 99.9% (Figure 1C). Bins with a coverage of at least 15 reads passed the Q30 (99.9%  
322 accuracy) threshold. At the Q30 threshold, an average of 8 mismatches per 9.5 kb genome  
323 could be observed, while aberrant deletions and insertions were completely resolved (Figure  
324 1D).

### 325 **Application of the assay on samples from PLWH and comparison to FLIPS**

326 To assess the performance of the HIV-PULSE assay on samples from ART-suppressed  
327 PLWH, and to benchmark it to a gold standard short-read sequencing assay, DNA from  
328 peripheral blood CD4 T cells from 4 individuals was subjected to both the HIV-PULSE and  
329 the FLIPS assay (Figure 2). This yielded a median of 18 FLIPS and 87 HIV-PULSE distinct  
330 proviruses per participant (Figure 2A and Supplemental Figure 2). Of note, in the case of  
331 FLIPS, 10 out of 136 HIV-1 PCR amplicons failed to produce a correct HIV-1 genome during  
332 *de novo* assembly (Supplemental Figure 2A, median of 2.5 assembly failures per  
333 participant). Across both assays, a total of 16 overlapping expansions of identical sequences  
334 (EIS) were observed (Figure 2A). HIV-PULSE successfully identified 81% (13/16) of the  
335 overlapping EIS as being clonal, while FLIPS detected 37.5% of the EIS (6/16). However,  
336 this discrepancy is probably the result of the lower number of genomes assayed with FLIPS  
337 (~5-fold). We compared the overlapping proviral sequences to estimate sequencing  
338 accuracy and link it to proviral classification. The mean accuracy was found to be 99.99%  
339 (Q40) for the megabinned proviruses, with residual errors observed in only four genomes

340 due to homopolymeric regions (Supplemental Figures 2B-C). However, these errors did not  
341 affect the correct HIV-1 proviral classification.

342 Overall, comparing HIV-PULSE results to FLIPS data reveals (i) No significant differences  
343 between the proportions of sampled unique proviruses with each assay (Figure 2A;  $p=1.00$ ,  
344  $p=0.583$ ,  $p=1.00$ ,  $p=1.00$  for P03, P12\_T1, P12\_T2 and P14, respectively) and (ii) No  
345 significant bias in the size distribution of the observed proviral genome lengths (Figure 2B,  
346 median lengths are 4,620 for HIV-PULSE and 4,531 for FLIPS,  $p=0.0810$ ). The efficiency of  
347 both methods was assessed by calculating the percentage of total detected proviruses out of  
348 the total HIV-1 DNA reservoir size (Figure 2C). Slightly lower efficiencies were observed with  
349 the HIV-PULSE assay (mean of 11% opposed to 18% with FLIPS,  $p=0.271$ ), however, this  
350 measure is likely an underestimation as it does not account for clonality of the reservoir (true  
351 size of clones is missed).

352 In conclusion, these results indicate that HIV-PULSE displays the required sensitivity for the  
353 amplification of NFL HIV-1 genomes from samples of ART-suppressed PLWH. Furthermore,  
354 both the accuracy and efficiency of the assay are on par with the FLIPS assay.

### 355 **HIV-PULSE enables high-throughput sequencing of NFL genomes in a large cohort of** 356 **PLWH**

357 The assay was next applied to peripheral blood CD4 T cell DNA of 18 chronically treated  
358 PLWH (mean time on ART = 11.2 years, Supplemental Table 1). The HIV-PULSE assay  
359 yielded an average of  $15 \pm 3$  distinct HIV-1 proviruses per replicate, per participant (range: 3-  
360 55). For each participant, a mean PCR success rate of 97% was observed among the 6  
361 PCR replicates based on agarose gel visualization (Supplemental Table 3). Overall, a total  
362 number of 1,661 proviruses (1,308 distinct) were retrieved across all participants (mean of  
363 87 HIV-1 proviruses per sample, Supplemental Table 3, Supplemental Figure 3). Excluding  
364 the effect of clonal proliferation on infected cells, we looked at the presence of putatively  
365 intact genomes within the 1,308 distinct proviruses. A mean proportion of 5% intact distinct

366 genomes was found across the 19 samples, which corresponds to previously reported  
367 numbers (Figure 3A) (16–18). Putatively intact sequences found across multiple replicates,  
368 indicative of clonality, were seen in 9/14 participants with at least 1 distinct intact sequence  
369 (Figure 3B). As two collected samples belonged to the same individual (P12) taken 3 years  
370 apart, a longitudinal assessment of the reservoir composition could be performed. This  
371 revealed the persistence of 21 infected cell clones (two with an intact provirus) between the  
372 two sampled timepoints (Figure 3, Supplemental Figure 4). No significant differences  
373 were observed in both the yield ( $p=0.662$ , 19 at T1 vs 18 at T2 mean distinct viruses per  
374 replicate, Figure 3A, Supplemental Table 2) and the observed mean pairwise distance  
375 among intact sequences between the two timepoints (P12\_T1: 0.0230  $n=7$  vs P12\_T2:  
376 0.0197,  $n=5$ ).

377 While the characteristics of the cohort are quite diverse, we were still able to get a fair  
378 number of proviral sequences in individuals with a low total HIV-1 reservoir size (<500 total  
379 HIV DNA copies/million CD4,  $n=3$ ). A significant correlation between the HIV-PULSE yield  
380 and the reservoir size measured by total HIV DNA was observed (Supplemental Figure 5,  
381  $R=0.71$ ,  $p=1.5 \times 10^{15}$ ). On average, the efficiency of HIV-PULSE for these samples was 13%  
382 (95% CI [7.9, 17.6]) as calculated by dividing the number of detected distinct proviruses by  
383 the total number of input HIV-1 copies per PCR replicate (Supplemental Table 3).  
384 Nevertheless, this measure of efficiency is an underestimation, as it does not account for  
385 clones found within a replicate.

### 386 **HIV-PULSE detects proviruses of the translation-competent HIV-1 reservoir**

387 While the proviral reservoir consists of a heterogeneous mix of HIV-1 proviruses belonging  
388 to different classes, only a few can contribute to viral rebound and/or HIV-1 pathogenesis by  
389 inducing chronic immune activation (e.g. intact, PSI/MSD defect) (20, 42, 43). Of particular  
390 clinical interest, the translation-competent HIV-1 reservoir represents all proviruses that can  
391 produce viral proteins following maximal stimulation, consequently enriching for replication-  
392 competent proviruses (42). In this regard, we next set out to evaluate whether HIV-PULSE



393 can capture proviruses that belong to the translation-competent reservoir, by comparing HIV-  
394 PULSE data (n=8 participants) to STIP-Seq data (Figure 4A). On average per individual,  
395 69% (95% CI [45, 92]) of the translation-competent STIP-Seq clones were detected with  
396 HIV-PULSE (as unique or clone). This corresponds to a total of 17 overlaps among both  
397 assays, of which 10/17 (59%) were also identified as a clone by HIV-PULSE, as they were  
398 detected across multiple replicates from the same participant (Figure 4B). Additionally, 17  
399 clones were found in the HIV-PULSE data but not sampled with STIP-Seq (6/17 intact),  
400 which could be due to the integration of those proviruses at a chromosomal location in  
401 regions with features (*e.g.* heterochromatin) associated with HIV-1 transcriptional latency or  
402 a location less prone to be induced by latency reversing agents or by the more limited  
403 number of proviruses assessed with STIP-Seq compared to HIV-PULSE (44, 45). In  
404 conclusion, HIV-PULSE reliably picks up proviruses that belong to the translation-competent  
405 reservoir, which is of high importance for applicability in a clinical setting.

## 406 **Discussion**

407 To achieve an HIV-1 cure, a comprehensive understanding of the persisting viral reservoir is  
408 crucial. Over the recent years, the application of HIV-1 NFL sequencing assays has  
409 increased our knowledge of certain key aspects, such as the proviral genomic composition  
410 and reservoir dynamics within PLWH. Still, all these results have been obtained through  
411 labor-intensive assays relying on limiting dilution and subsequent one-by-one sequencing of  
412 proviral genomes, limiting their application in large-scale studies. Here, we present the HIV-  
413 PULSE assay, allowing for a scalable, high-throughput assessment of the proviral HIV-1  
414 reservoir. The use of dual barcodes removes the need for limiting dilution, allowing the  
415 amplification of multiple proviral HIV-1 templates during long-range NFL PCR on bulk DNA,  
416 while overcoming the inherently low single-read accuracy of long-read sequencing  
417 technologies. Benchmarking against the gold standard FLIPS method revealed comparable  
418 accuracy and efficiency, though notable differences in terms of throughput and associated  
419 costs are apparent. An overview of the approximated cost (in USD) per proviral sequence for  
420 each method indicates a 10-fold price reduction in favor of HIV-PULSE (Supplemental Table  
421 4). Aside from a clear cost benefit, eliminating the limiting dilution step and sampling multiple  
422 proviruses out of a single PCR reaction offers a more high-throughput approach to NFL HIV-  
423 1 reservoir characterization. To illustrate, at least 52 96-well FLIPS PCR plates at limiting  
424 dilution would be required to obtain the equivalent of 1,661 total HIV-PULSE proviruses  
425 (Supplemental Table 4). Also, as a consequence of employing short-read NGS, FLIPS  
426 requires a *de novo* assembly step, which sometimes fails when resolving more complex  
427 genomes.

428 In this study, we applied HIV-PULSE to peripheral blood samples from a cohort of 18 PLWH  
429 on chronic ART, to study the composition of their HIV-1 viral reservoir. Out of the 1,308  
430 distinct proviruses detected, ~5% were deemed genome-intact, agreeing with earlier reports  
431 on PLWH on chronic ART (16). We compared the HIV-PULSE assay to the STIP-Seq assay  
432 for 8 participants, showing that HIV-PULSE efficiently picked up translation-competent

433 proviruses, detecting 69% of the clonal sequences found with STIP-Seq. Interestingly, HIV-  
434 PULSE detected additional putatively intact proviral genomes which were not detected with  
435 the STIP-Seq assay, potentially representing hard-to-reactivate proviruses in a deep state of  
436 latency. While the HIV-PULSE assay does not enable a specific enrichment of the  
437 translation-competent reservoir, these findings make a case for HIV-PULSE as a tool to  
438 perform qualitative in-depth characterization of the functional reservoir dynamics in response  
439 to curative interventions during clinical trials. The high-throughput and cost-efficient nature of  
440 the HIV-PULSE assay makes it an attractive method for use within large-scale clinical  
441 studies of the HIV-1 reservoir with applications ranging from performing a longitudinal  
442 phylogenetic analysis of the proviral reservoir, screening multiple samples from the same  
443 individual for compartmentalization across different tissues, drug-resistance screening and  
444 bNAb epitope mapping. Indeed, implementing a qualitative NFL approach in clinical trial  
445 settings could help to check whether participants are eligible by excluding pre-existing  
446 resistance to a compound of interest or to assess immune escape following the intervention  
447 (46–48).

448 The adoption of long-read sequencing technologies for amplicon sequencing has historically  
449 been taken aback by the poor single-read accuracy. Notwithstanding these initial  
450 reservations, others have been developing long-read assays to characterize different  
451 aspects of the HIV-1 reservoir over the last couple of years. Pooled CRISPR Inverse PCR  
452 sequencing (PCIP-seq) allows to study both the integration site and the associated provirus  
453 using a targeted enrichment and inverse PCR strategy (49). While the collected data is  
454 certainly informative, the approach is hampered by limited sensitivity (3.2%), inadequate  
455 proviral coverage for accurate genome assembly and its reliance on the design of a custom  
456 pool of CRISPR guide RNAs for each participant. In comparison, HIV-PULSE has an  
457 improved sensitivity (13%), produces high-accuracy genomes, and does not rely on  
458 individualized primer designs, although information on the genomic location of the integrated  
459 provirus is missing. Another group developed NanoHIV, a bioinformatics tool to construct

460 HIV-1 consensus sequences from long-read ONT data (50). This follows a reference  
461 mapping-based strategy with consecutive mappings to refine the original draft and deal with  
462 variable genomic regions. To compare the performance, they generated consensus  
463 genomes of NFL amplicons (acquired via nested NFL PCR performed at limiting dilution)  
464 and performed sequencing with both ONT and NGS Illumina. The authors report a mean  
465 accuracy of 99.4% (or 54 errors in a 9 kb genome), considerably lower than the megabin  
466 accuracy of 99.99% (or 1 error in a 9 kb genome) reported with our bioinformatics pipeline.  
467 Two studies describe protocols to amplify and sequence different genomic regions with  
468 accuracies up to 99.9% from virions in plasma samples from viremic individuals. While one  
469 relies on circular consensus sequencing (CSS) reads with PacBio technology to obtain 2.6  
470 kb full-length *env* sequences (51), the other method Multi-read Hairpin Mediated Error-  
471 Correction Reaction (MrHAMER) targets a 4.6 kb *gag-pol* region followed by sequencing on  
472 a MinION ONT device (52). Despite showcasing great promise, the aforementioned  
473 strategies have not been applied to the more challenging setting of HIV-1 reservoir, which  
474 requires several orders of magnitude greater sensitivity.

475 We do acknowledge some limitations to this assay. First, the inclusion of the pre-  
476 amplification step to ensure efficient tagging and enrichment impedes the accurate  
477 quantification of reservoir clonality, as the dual UMI tags are only incorporated after the initial  
478 pre-amplification cycles. However, by performing multiple PCR replicates, we were still able  
479 to identify most clonal populations throughout this study. Further research into increasing the  
480 efficiency of the UMI tagging step would be needed to omit the pre-amplification step.  
481 Despite the limitations of HIV-PULSE in terms of accurate reservoir quantification, the assay  
482 can be valuable in areas where quantification does not matter, such as the aforementioned  
483 HIV-1 phylogenetics, drug resistance screening, and bNAb epitope mapping. Second, while  
484 we cannot exclude the possibility of chimera formation during the initial pre-amplification  
485 step, we consider it to be nearly impossible as chimera formation by PCR polymerase is  
486 normally observed in reactions with high numbers of PCR cycles (53). Third, we successfully

487 applied the HIV-PULSE assay on samples from a chronic cohort of PLWH, yet samples from  
488 PLWH with different characteristics might be more challenging. As some steps of the  
489 analysis workflow rely on the sequence diversity to cluster identical bins into megabins to  
490 deconvolute the effect of pre-amplification, proviral reservoirs with lower intra-host sequence  
491 diversity (e.g. early ART initiation) could limit the success of this approach.

492 In conclusion, the HIV-PULSE assay presents itself as a promising HIV-1 NFL proviral  
493 sequencing method that enables scalable, high-throughput characterization of the proviral  
494 reservoir, while retaining sequencing accuracy comparable to HIV-1 NFL assays currently  
495 used in the field. We are convinced that the HIV-PULSE assay will be a valuable asset in  
496 advancing our understanding of the composition and dynamics of the viral reservoir during  
497 future basic and translational HIV-1 research.

498 **Data Availability**

499 HIV-1 proviral sequences are uploaded to GenBank (accession numbers pending for  
500 GenBank approval). Sequencing data has been submitted to Sequence Read Archive (SRA)  
501 under BioProject ID (will be made available upon publication). The bioinformatics pipeline is  
502 available at [https://github.com/laulambr/longread\\_umi\\_hiv](https://github.com/laulambr/longread_umi_hiv).

503 **Funding**

504 This current research work was supported by the NIH (R01-AI134419, MPI: L.V.) and the  
505 Research Foundation Flanders (S000319N and G0B3820N). L.V. was supported by the  
506 Research Foundation Flanders (1.8.020.09.N.00) and the Collen-Francqui Research  
507 Professor Mandate. The sample collection at UZ Ghent was supported by an MSD  
508 investigator grant (ISS 52777). B.C. and L.L. were supported by FWO Vlaanderen  
509 (1S28918N and 1S29220N).

510 **Conflict of interest**

511 L.L. has received a travel grant from Oxford Nanopore Technologies (ONT) to present his  
512 findings at a scientific meeting.

513 **Acknowledgements**

514 We would like to acknowledge and thank all participants who donated samples and all the  
515 clinicians and study nurses that assisted with the sample collection. We are grateful for the  
516 discussions with and input from Sarah Palmer, Bethany Horsburgh and Søren Karst. In  
517 addition, we would like to thank Ellen De Meester, Sarah De Keulenaer, and Sylvie  
518 Decraene from NXTGNT for their assistance in performing MiSeq sequencing. The following  
519 reagents were obtained through the NIH HIV Reagent Program, Division of AIDS, NIAID,  
520 NIH: J-Lat Full Length Cells (8.4), ARP-9847, contributed by Dr. Eric Verdin and Jurkat (E6-  
521 1) Cells, ARP-177, contributed by ATCC (Dr. Arthur Weiss).

522 **References**

- 523 1. Finzi,D., Hermankova,M., Pierson,T., Carruth,L.M., Buck,C., Chaisson,R.E., Quinn,T.C.,  
524 Chadwick,K., Margolick,J., Brookmeyer,R., *et al.* (1997) Identification of a reservoir  
525 for HIV-1 in patients on highly active antiretroviral therapy. *Science*, **278**, 1295–1300.
- 526 2. Wong,J.K., Hezareh,M., Günthard,H.F., Havlir,D.V., Ignacio,C.C., Spina,C.A. and  
527 Richman,D.D. (1997) Recovery of Replication-Competent HIV Despite Prolonged  
528 Suppression of Plasma Viremia. *Science*, **278**, 1291–1295.
- 529 3. Chun,T.W., Engel,D., Berrey,M.M., Shea,T., Corey,L. and Fauci,A.S. (1998) Early  
530 establishment of a pool of latently infected, resting CD4(+) T cells during primary  
531 HIV-1 infection. *Proc Natl Acad Sci U S A*, **95**, 8869–8873.
- 532 4. Finzi,D., Blankson,J., Siliciano,J.D., Margolick,J.B., Chadwick,K., Pierson,T., Smith,K.,  
533 Lisziewicz,J., Lori,F., Flexner,C., *et al.* (1999) Latent infection of CD4+ T cells  
534 provides a mechanism for lifelong persistence of HIV-1, even in patients on effective  
535 combination therapy. *Nat Med*, **5**, 512–517.
- 536 5. Chun,T.-W., Justement,J.S., Murray,D., Hallahan,C.W., Maenza,J., Collier,A.C.,  
537 Sheth,P.M., Kaul,R., Ostrowski,M., Moir,S., *et al.* (2010) Rebound of plasma viremia  
538 following cessation of antiretroviral therapy despite profoundly low levels of HIV  
539 reservoir: implications for eradication. *AIDS*, **24**, 2803–2808.
- 540 6. Davey,R.T., Bhat,N., Yoder,C., Chun,T.-W., Metcalf,J.A., Dewar,R., Natarajan,V.,  
541 Lempicki,R.A., Adelsberger,J.W., Miller,K.D., *et al.* (1999) HIV-1 and T cell dynamics  
542 after interruption of highly active antiretroviral therapy (HAART) in patients with a  
543 history of sustained viral suppression. *Proc Natl Acad Sci U S A*, **96**, 15109–15114.
- 544 7. Eriksson,S., Graf,E.H., Dahl,V., Strain,M.C., Yukl,S.A., Lysenko,E.S., Bosch,R.J., Lai,J.,  
545 Chioma,S., Emad,F., *et al.* (2013) Comparative Analysis of Measures of Viral  
546 Reservoirs in HIV-1 Eradication Studies. *PLOS Pathogens*, **9**, e1003174.
- 547 8. Siliciano,J.D., Kajdas,J., Finzi,D., Quinn,T.C., Chadwick,K., Margolick,J.B., Kovacs,C.,  
548 Gange,S.J. and Siliciano,R.F. (2003) Long-term follow-up studies confirm the stability  
549 of the latent reservoir for HIV-1 in resting CD4+ T cells. *Nat Med*, **9**, 727–728.
- 550 9. Deeks,S.G., Archin,N., Cannon,P., Collins,S., Jones,R.B., de Jong,M.A.W.P.,  
551 Lambotte,O., Lamplough,R., Ndung'u,T., Sugarman,J., *et al.* (2021) Research  
552 priorities for an HIV cure: International AIDS Society Global Scientific Strategy 2021.  
553 *Nat Med*, **27**, 2085–2098.
- 554 10. Lambrechts,L., Cole,B., Rutsaert,S., Trypsteen,W. and Vandekerckhove,L. (2020)  
555 Emerging PCR-Based Techniques to Study HIV-1 Reservoir Persistence. *Viruses*,  
556 **12**, 149.
- 557 11. Crooks,A.M., Bateson,R., Cope,A.B., Dahl,N.P., Griggs,M.K., Kuruc,J.D., Gay,C.L.,  
558 Eron,J.J., Margolis,D.M., Bosch,R.J., *et al.* (2015) Precise Quantitation of the Latent  
559 HIV-1 Reservoir: Implications for Eradication Strategies. *J Infect Dis*, **212**, 1361–  
560 1365.
- 561 12. Lorenzi,J.C.C., Cohen,Y.Z., Cohn,L.B., Kreider,E.F., Barton,J.P., Learn,G.H., Oliveira,T.,  
562 Lavine,C.L., Horwitz,J.A., Settler,A., *et al.* (2016) Paired quantitative and qualitative  
563 assessment of the replication-competent HIV-1 reservoir and comparison with  
564 integrated proviral DNA. *Proc Natl Acad Sci U S A*, **113**, E7908–E7916.

- 565 13. Palmer,S., Kearney,M., Maldarelli,F., Halvas,E.K., Bixby,C.J., Bazmi,H., Rock,D.,  
566 Falloon,J., Davey,R.T., Dewar,R.L., *et al.* (2005) Multiple, Linked Human  
567 Immunodeficiency Virus Type 1 Drug Resistance Mutations in Treatment-  
568 Experienced Patients Are Missed by Standard Genotype Analysis. *J Clin Microbiol*,  
569 **43**, 406–413.
- 570 14. Josefsson,L., Palmer,S., Faria,N.R., Lemey,P., Casazza,J., Ambrozak,D., Kearney,M.,  
571 Shao,W., Kottlil,S., Sneller,M., *et al.* (2013) Single Cell Analysis of Lymph Node  
572 Tissue from HIV-1 Infected Patients Reveals that the Majority of CD4+ T-cells  
573 Contain One HIV-1 DNA Molecule. *PLoS Pathog*, **9**.
- 574 15. Ho,Y.-C., Shan,L., Hosmane,N.N., Wang,J., Laskey,S.B., Rosenbloom,D.I.S., Lai,J.,  
575 Blankson,J.N., Siliciano,J.D. and Siliciano,R.F. (2013) Replication-competent  
576 noninduced proviruses in the latent reservoir increase barrier to HIV-1 cure. *Cell*,  
577 **155**, 540–51.
- 578 16. Bruner,K.M., Murray,A.J., Pollack,R.A., Soliman,M.G., Laskey,S.B., Capoferri,A.A.,  
579 Lai,J., Strain,M.C., Lada,S.M., Hoh,R., *et al.* (2016) Defective proviruses rapidly  
580 accumulate during acute HIV-1 infection. *Nature medicine*, **22**, 1043–9.
- 581 17. Hiener,B., Horsburgh,B.A., Eden,J.-S., Barton,K., Schlub,T.E., Lee,E., von  
582 Stockenström,S., Odeval, L., Milush,J.M., Liegler,T., *et al.* (2017) Identification of  
583 Genetically Intact HIV-1 Proviruses in Specific CD4+ T Cells from Effectively Treated  
584 Participants. *Cell reports*, **21**, 813–822.
- 585 18. Lee,G.Q., Orlova-Fink,N., Einkauf,K., Chowdhury,F.Z., Sun,X., Harrington,S., Kuo,H.H.,  
586 Hua,S., Chen,H.R., Ouyang,Z., *et al.* (2017) Clonal expansion of genome-intact HIV-  
587 1 in functionally polarized Th1 CD4+T cells. *Journal of Clinical Investigation*, **127**.
- 588 19. Pinzone,M.R., VanBelzen,D.J., Weissman,S., Bertuccio,M.P., Cannon,L., Venanzi-  
589 Rullo,E., Migueles,S., Jones,R.B., Mota,T., Joseph,S.B., *et al.* (2019) Longitudinal  
590 HIV sequencing reveals reservoir expression leading to decay which is obscured by  
591 clonal expansion. *Nat Commun*, **10**, 728.
- 592 20. Cole,B., Lambrechts,L., Gantner,P., Noppe,Y., Bonine,N., Witkowski,W., Chen,L.,  
593 Palmer,S., Mullins,J.I., Chomont,N., *et al.* (2021) In-depth single-cell analysis of  
594 translation-competent HIV-1 reservoirs identifies cellular sources of plasma viremia.  
595 *Nat Commun*, **12**, 3727.
- 596 21. Sannier,G., Dubé,M., Dufour,C., Richard,C., Brassard,N., Delgado,G.-G., Pagliuzza,A.,  
597 Baxter,A.E., Niessl,J., Brunet-Ratnasingham,E., *et al.* (2021) Combined single-cell  
598 transcriptional, translational, and genomic profiling reveals HIV-1 reservoir diversity.  
599 *Cell Reports*, **36**, 109643.
- 600 22. Gantner,P., Buranapraditkun,S., Pagliuzza,A., Dufour,C., Pardons,M., Mitchell,J.L.,  
601 Kroon,E., Sacdalan,C., Tulmethakaan,N., Pinyakorn,S., *et al.* (2022) HIV rapidly  
602 targets a diverse pool of CD4+ T cells to establish productive and latent infections.  
603 [10.1101/2022.05.10.491275](https://doi.org/10.1101/2022.05.10.491275).
- 604 23. Lee,G.Q. (2021) Chemistry and Bioinformatics Considerations in Using Next-Generation  
605 Sequencing Technologies to Inferring HIV Proviral DNA Genome-Intactness. *Viruses*,  
606 **13**, 1874.



- 607 24. Shendure, J., Balasubramanian, S., Church, G.M., Gilbert, W., Rogers, J., Schloss, J.A. and  
608 Waterston, R.H. (2017) DNA sequencing at 40: past, present and future. *Nature*, **550**,  
609 345–353.
- 610 25. Karst, S.M., Ziels, R.M., Kirkegaard, R.H., Sørensen, E.A., McDonald, D., Zhu, Q., Knight, R.  
611 and Albertsen, M. (2021) High-accuracy long-read amplicon sequences using unique  
612 molecular identifiers with Nanopore or PacBio sequencing. *Nat Methods*, **18**, 165–  
613 169.
- 614 26. Jordan, A., Bisgrove, D. and Verdin, E. (2003) HIV reproducibly establishes a latent  
615 infection after acute infection of T cells in vitro. *EMBO J*, **22**, 1868–1877.
- 616 27. Weiss, A., Wiskocil, R.L. and Stobo, J.D. (1984) The role of T3 surface molecules in the  
617 activation of human T cells: a two-stimulus requirement for IL 2 production reflects  
618 events occurring at a pre-translational level. *J Immunol*, **133**, 123–128.
- 619 28. Rutsaert, S., De Spiegelaere, W., De Clercq, L. and Vandekerckhove, L. (2019) Evaluation  
620 of HIV-1 reservoir levels as possible markers for virological failure during boosted  
621 darunavir monotherapy. *Journal of Antimicrobial Chemotherapy*, **74**, 3030–3034.
- 622 29. Trypsteen, W., Vynck, M., De Neve, J., Bonczkowski, P., Kiselinova, M., Malatinkova, E.,  
623 Vervisch, K., Thas, O., Vandekerckhove, L. and De Spiegelaere, W. (2015)  
624 ddpcRquant: threshold determination for single channel droplet digital PCR  
625 experiments. *Anal Bioanal Chem*, **407**, 5827–5834.
- 626 30. Martin, M. (2011) Cutadapt removes adapter sequences from high-throughput  
627 sequencing reads. *EMBnet journal*, **17**, 10–12.
- 628 31. Edgar, R.C. (2010) Search and clustering orders of magnitude faster than BLAST.  
629 *Bioinformatics*, **26**, 2460–2461.
- 630 32. Li, H. (2018) Minimap2: pairwise alignment for nucleotide sequences. *Bioinformatics*, **34**,  
631 3094–3100.
- 632 33. Vaser, R., Sović, I., Nagarajan, N. and Šikić, M. (2017) Fast and accurate de novo genome  
633 assembly from long uncorrected reads. *Genome Res*, **27**, 737–746.
- 634 34. MEGAHIT: an ultra-fast single-node solution for large and complex metagenomics  
635 assembly via succinct de Bruijn graph | Bioinformatics | Oxford Academic.
- 636 35. Altschul, S.F., Gish, W., Miller, W., Myers, E.W. and Lipman, D.J. (1990) Basic local  
637 alignment search tool. *Journal of Molecular Biology*, **215**, 403–410.
- 638 36. Katoh, K., Misawa, K., Kuma, K. and Miyata, T. (2002) MAFFT: a novel method for rapid  
639 multiple sequence alignment based on fast Fourier transform. *Nucleic Acids Res*, **30**,  
640 3059–3066.
- 641 37. Deng, W., Maust, B.S., Nickle, D.C., Learn, G.H., Liu, Y., Heath, L., Kosakovsky Pond, S.L.  
642 and Mullins, J.I. (2010) DIVEIN: a web server to analyze phylogenies, sequence  
643 divergence, diversity, and informative sites. *Biotechniques*, **48**, 405–408.
- 644 38. Guindon, S., Dufayard, J.-F., Lefort, V., Anisimova, M., Hordijk, W. and Gascuel, O. (2010)  
645 New Algorithms and Methods to Estimate Maximum-Likelihood Phylogenies:  
646 Assessing the Performance of PhyML 3.0. *Systematic Biology*, **59**, 307–321.

- 647 39. R Core Team R: A Language and Environment for Statistical Computing R Foundation  
648 for Statistical Computing, Vienna, Austria.
- 649 40. Hadley,W. (2016) ggplot2: Elegant Graphics for Data Analysis Springer-Verlag New  
650 York.
- 651 41. Yu,G. (2020) Using ggtree to Visualize Data on Tree-Like Structures. *Curr Protoc*  
652 *Bioinformatics*, **69**, e96.
- 653 42. Pollack,R.A., Jones,R.B., Pertea,M., Bruner,K.M., Martin,A.R., Thomas,A.S.,  
654 Capoferri,A.A., Beg,S.A., Huang,S.-H., Karandish,S., *et al.* (2017) Defective HIV-1  
655 proviruses are expressed and can be recognized by cytotoxic T lymphocytes which  
656 shapes the proviral landscape. *Cell Host Microbe*, **21**, 494-506.e4.
- 657 43. White,J.A., Wu,F., Yasin,S., Moskovljevic,M., Varriale,J., Dragoni,F., Contreras,A.C.,  
658 Duan,J., Zheng,M.Y., Tadzong,N.F., *et al.* (2023) Clonally expanded HIV-1  
659 proviruses with 5'-Leader defects can give rise to nonsuppressible residual viremia. *J*  
660 *Clin Invest*, 10.1172/JCI165245.
- 661 44. Lewinski,M.K., Bisgrove,D., Shinn,P., Chen,H., Hoffmann,C., Hannehalli,S., Verdin,E.,  
662 Berry,C.C., Ecker,J.R. and Bushman,F.D. (2005) Genome-wide analysis of  
663 chromosomal features repressing human immunodeficiency virus transcription. *J*  
664 *Viro*, **79**, 6610–6619.
- 665 45. Einkauf,K.B., Osborn,M.R., Gao,C., Sun,W., Sun,X., Lian,X., Parsons,E.M.,  
666 Gladkov,G.T., Seiger,K.W., Blackmer,J.E., *et al.* (2022) Parallel analysis of  
667 transcription, integration, and sequence of single HIV-1 proviruses. *Cell*, **185**, 266-  
668 282.e15.
- 669 46. Mendoza,P., Gruell,H., Nogueira,L., Pai,J.A., Butler,A.L., Millard,K., Lehmann,C.,  
670 Suárez,I., Oliveira,T.Y., Lorenzi,J.C.C., *et al.* (2018) Combination therapy with anti-  
671 HIV-1 antibodies maintains viral suppression. *Nature*, **561**, 479–484.
- 672 47. Liu,B., Zhang,W., Xia,B., Jing,S., Du,Y., Zou,F., Li,R., Lu,L., Chen,S., Li,Y., *et al.* (2021)  
673 Broadly neutralizing antibody–derived CAR T cells reduce viral reservoir in  
674 individuals infected with HIV-1. *J Clin Invest*, **131**.
- 675 48. Gunst,J.D., Pahus,M.H., Rosás-Umbert,M., Lu,I.-N., Benfield,T., Nielsen,H.,  
676 Johansen,I.S., Mohey,R., Østergaard,L., Klastrup,V., *et al.* (2022) Early intervention  
677 with 3BNC117 and romidepsin at antiretroviral treatment initiation in people with HIV-  
678 1: a phase 1b/2a, randomized trial. *Nat Med*, **28**, 2424–2435.
- 679 49. Artesi,M., Hahaut,V., Cole,B., Lambrechts,L., Ashrafi,F., Marçais,A., Hermine,O.,  
680 Griebel,P., Arsic,N., van der Meer,F., *et al.* (2021) PCIP-seq: simultaneous  
681 sequencing of integrated viral genomes and their insertion sites with long reads.  
682 *Genome Biology*, **22**, 97.
- 683 50. Wright,I.A., Delaney,K.E., Katusiime,M.G.K., Botha,J.C., Engelbrecht,S., Kearney,M.F.  
684 and van Zyl,G.U. (2021) NanoHIV: A Bioinformatics Pipeline for Producing Accurate,  
685 Near Full-Length HIV Proviral Genomes Sequenced Using the Oxford Nanopore  
686 Technology. *Cells*, **10**, 2577.
- 687 51. Laird Smith,M., Murrell,B., Eren,K., Ignacio,C., Landais,E., Weaver,S., Phung,P.,  
688 Ludka,C., Hepler,L., Caballero,G., *et al.* (2016) Rapid Sequencing of Complete env  
689 Genes from Primary HIV-1 Samples. *Virus Evol*, **2**, vew018.

690 52. Gallardo,C.M., Wang,S., Montiel-Garcia,D.J., Little,S.J., Smith,D.M., Routh,A.L. and  
691 Torbett,B.E. (2021) MrHAMER yields highly accurate single molecule viral  
692 sequences enabling analysis of intra-host evolution. *Nucleic Acids Research*, **49**,  
693 e70.

694 53. Sze,M.A. and Schloss,P.D. (2019) The Impact of DNA Polymerase and Number of  
695 Rounds of Amplification in PCR on 16S rRNA Gene Sequence Data. *mSphere*, **4**,  
696 e00163-19.

697

698 **Table and Figure Legends**

699 **Figure 1 HIV-PULSE methodology overview and performance evaluation.**

700 (A) Schematic overview of the HIV-PULSE assay. A PCR reaction with bulk DNA containing  
701 multiple HIV-1 templates is pre-amplified using outer HIV-1 primers for a limited number of  
702 cycles to improve sensitivity. Next, pre-amplified material is tagged with a dual barcode  
703 consisting of a unique molecular identifier (UMI) attached to both ends using an HIV-1  
704 specific inner primer. To generate enough material for long-read library preparation, the  
705 tagged material is amplified with synthetic primers in several PCR rounds followed by clean  
706 up to prevent length bias. (B) Success rate of the HIV-PULSE assay for different input ratios  
707 of HIV-1 with varying number of PCR cycles during pre-amplification. Each condition was  
708 performed in triplicate. (C) Mean accuracy of HIV-PULSE bin consensus sequences with  
709 increasing bin coverage compared to the Illumina reference sequence. The dashed line  
710 indicates the Q30 (99.9% accuracy) threshold. (D) Mean number of errors (insertions,  
711 deletions and mismatches) found in HIV-PULSE consensus sequences of 9.5 kb with  
712 increasing bin coverage compared to the Illumina reference sequence.

713 **Figure 2 Benchmarking assays: novel HIV-PULSE vs gold standard FLIPS.**

714 (A) Donut plots displaying the fraction of unique and presumed clonal proviral sequences  
715 detected in each participant for both assays. The number of distinct proviruses generated by  
716 each assay is shown in the middle of each donut. The matching colored slices indicate the 6  
717 out of 16 overlapping expansions of identical sequences (EIS) found to be clonal in both  
718 assays.  $p$  values test was used for a difference in the proportion of unique proviruses  
719 between both assays by “prop.test” in R, none were significant ( $p=1.00$ ,  $p=0.583$ ,  $p=1.00$ ,  
720  $p=1.00$  for P03, P12\_T1, P12\_T2 and P14, respectively). (B) Size distributions of the  
721 observed proviral genome lengths for each assay. No significant difference was observed  
722 between both assays using a Kruskal-Wallis test ( $p= 0.08099$ ). Each dot represents a single  
723 distinct provirus and is given a color for each participant. (C) For each assay and participant,  
724 the percentage of detected proviruses out of the total HIV-1 DNA reservoir size is shown.

725 Assay efficiencies were compared for significance using a Kruskal-Wallis test -test  
726 ( $p=0.248$ ).

727 **Figure 3 Proviral reservoir as assayed by the HIV-PULSE assay for a chronic cohort.**

728 (A) The proportions of different proviral classes observed among the distinct proviruses for  
729 each participant. On the right the number of total and distinct proviruses is displayed for  
730 each participant. (B) A phylogenetic tree including the distinct genome intact sequences.  
731 Each participant is shown as different colored dots, empty symbols indicate sequences only  
732 found once (unique, white insert) in a PCR replicate.

733 **Figure 4 Benchmarking of HIV-PULSE vs STIP-Seq assay.**

734 (A) Phylogenetic tree including all distinct proviruses obtained with the HIV-PULSE  
735 (excluding sequences with inversions, large deletions and hypermutations) and STIP-Seq  
736 assays for 8 participants. Symbols reflect the different assays, proviruses only recovered in a  
737 single assay are shown in grey while assay overlapping are shown in red (STIP-Seq) or blue  
738 (HIV-PULSE). Empty symbols indicate sequences were found once (unique, white insert) in  
739 that respective assay. The outer and inner circles indicate for each provirus respectively the  
740 participant origin and associated HIV-1 genome classification. (B) UpSet-plot visualizing the  
741 number of overlaps between clonal and unique proviruses recovered with each respective  
742 assays.

743

744 **Supplemental Table 1 Clinical characteristics of chronic cohort participants.**

745 **Supplemental Table 2 List of primers used throughout the study.**

746 **Supplemental Table 3 Performance results of the HIV-PULSE assay on participants of  
747 a chronic cohort.**

748 **Supplemental Table 4 Estimated costs per sequenced virus for FLIPS and HIV-PULSE.**

749

750

751 **Supplemental Figure 1 HIV-PULSE assay details and performance.**

752 (A) Visual presentation of the HIV-PULSE read construct layout. (B) Schematic  
753 representation of the bioinformatics workflow to analyze HIV-PULSE data. (C) Number of  
754 total reads for each HIV-PULSE sequencing run (LIB1 contained J-Lat 8.4 amplicon data,  
755 from LIB2 onwards clinical samples). (D) Sequencing library size (in base pairs) for each  
756 HIV-PULSE sequencing run. (E) Percentage of HIV-1 reads out of the total reads for each  
757 HIV-PULSE sequencing run. (F) Median read length of HIV-1 reads for each HIV-PULSE  
758 sequencing run. (G) Percentage of bins deemed correct out of the total detected bins for  
759 each HIV-PULSE sequencing run. (H) Percentage of reads belonging to correct bins out of  
760 the total number of binned reads for each HIV-PULSE sequencing run.

761 **Supplemental Figure 2 Proviral reservoir as assayed by FLIPS.**

762 (A) The proportions of different proviral classes observed among the distinct FLIPS  
763 proviruses for each participant. On the right the number of total and distinct proviruses,  
764 including proviruses that failed during *de novo* assembly is displayed for each participant (B)  
765 Distribution of the accuracy rates for all overlapping proviruses at different stages of the  
766 bioinformatics pipeline. The raw reads indicate the single-read accuracy (n= 232,131),  
767 racon3x and racon3x\_medaka1x depict the HIV-PULSE bins (n=2,668) and megabins  
768 consists of the clustered HIV-PULSE bins (n=16). (C) Accuracy rates of overlapping  
769 proviruses detected with HIV-PULSE assay compared to their FLIPS Illumina reference  
770 counterpart. The color indicates the proviral genome classification by the HIV-PULSE assay  
771 for each respective provirus.

772

773

774 **Supplemental Figure 3 Bin coverage in function of amplicon length for all individuals.**

775 Each dot represents a single HIV-PULSE bin and is given a color based on the PCR-  
776 replicate. The dashed red line indicates the Q30 (99.9%) bin accuracy threshold.

777

778 **Supplemental Figure 4 Comparison of longitudinal sequencing data for P12.**

779 Phylogenetic tree of HIV-PULSE proviruses from P12 sampled at different timepoints (3 year  
780 interval). Tree was rooted against HXB2 and inversions were excluded (excluding 1 of the 21  
781 timepoint overlapping clonal sequences). The symbols indicate the first (diamond) and  
782 second (circle) sampling timepoint while colors indicate whether the provirus was detected  
783 as clonal by the HIV-PULSE assay at that timepoint. The red arrows highlight identical  
784 proviral sequences detected at both timepoints.

785 **Supplemental Figure 5 Correlation between the number of distinct HIV-1 proviruses  
786 per PCR replicate and the total HIV-1 DNA reservoir size.**

787 For each participant, the number of distinct viruses for each sequenced PCR replicate are  
788 shown with the averages indicated as empty circles. A Spearman correlation ( $R=0.71$ ,  
789  $p=1.5 \times 10^{-15}$ ) is made between the mean number of distinct and total HIV-1 DNA  
790 copies/million CD4 cells as measured by ddPCR.

# Figure 1

**A**

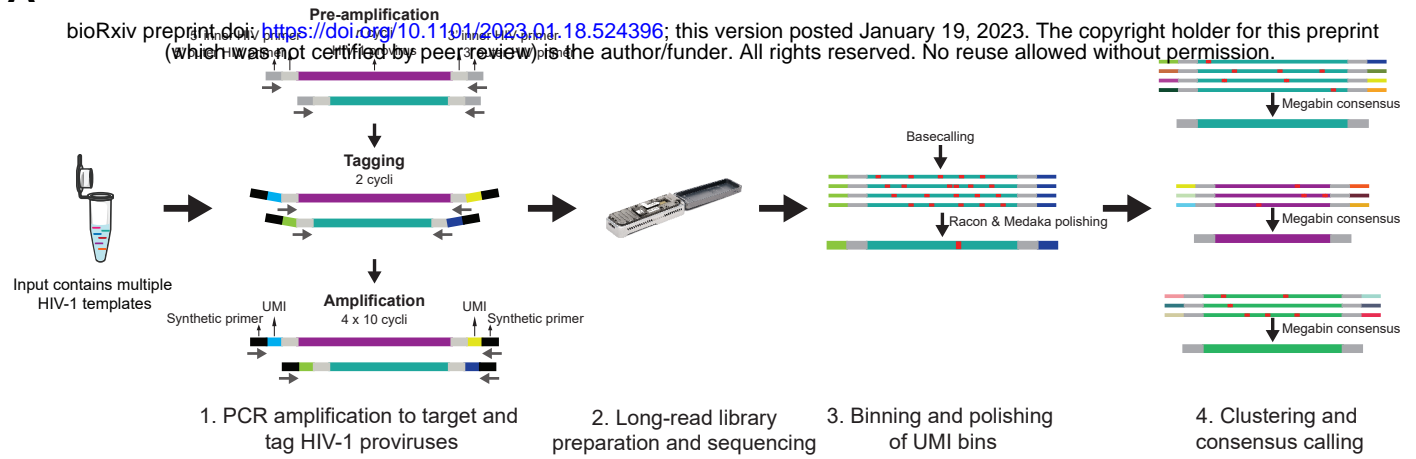

**B**

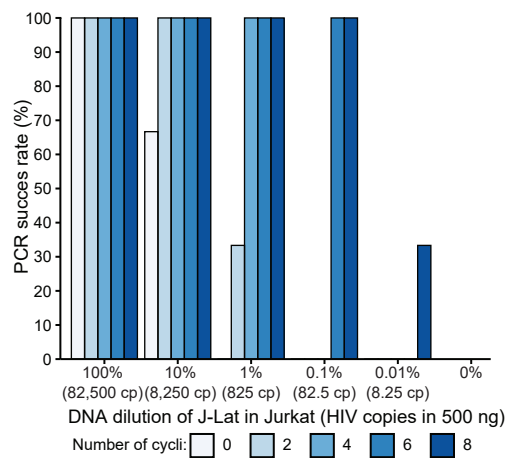

**C**

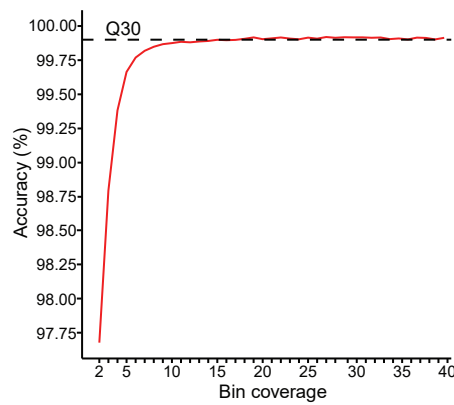

**D**

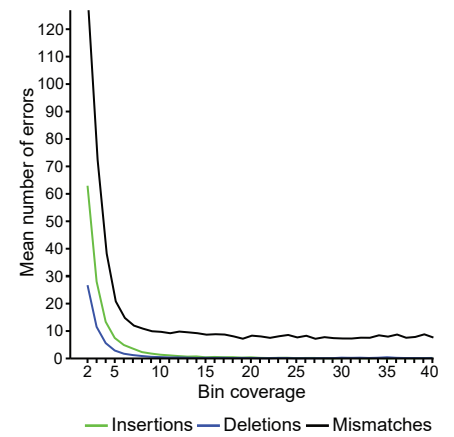



**Figure 2**

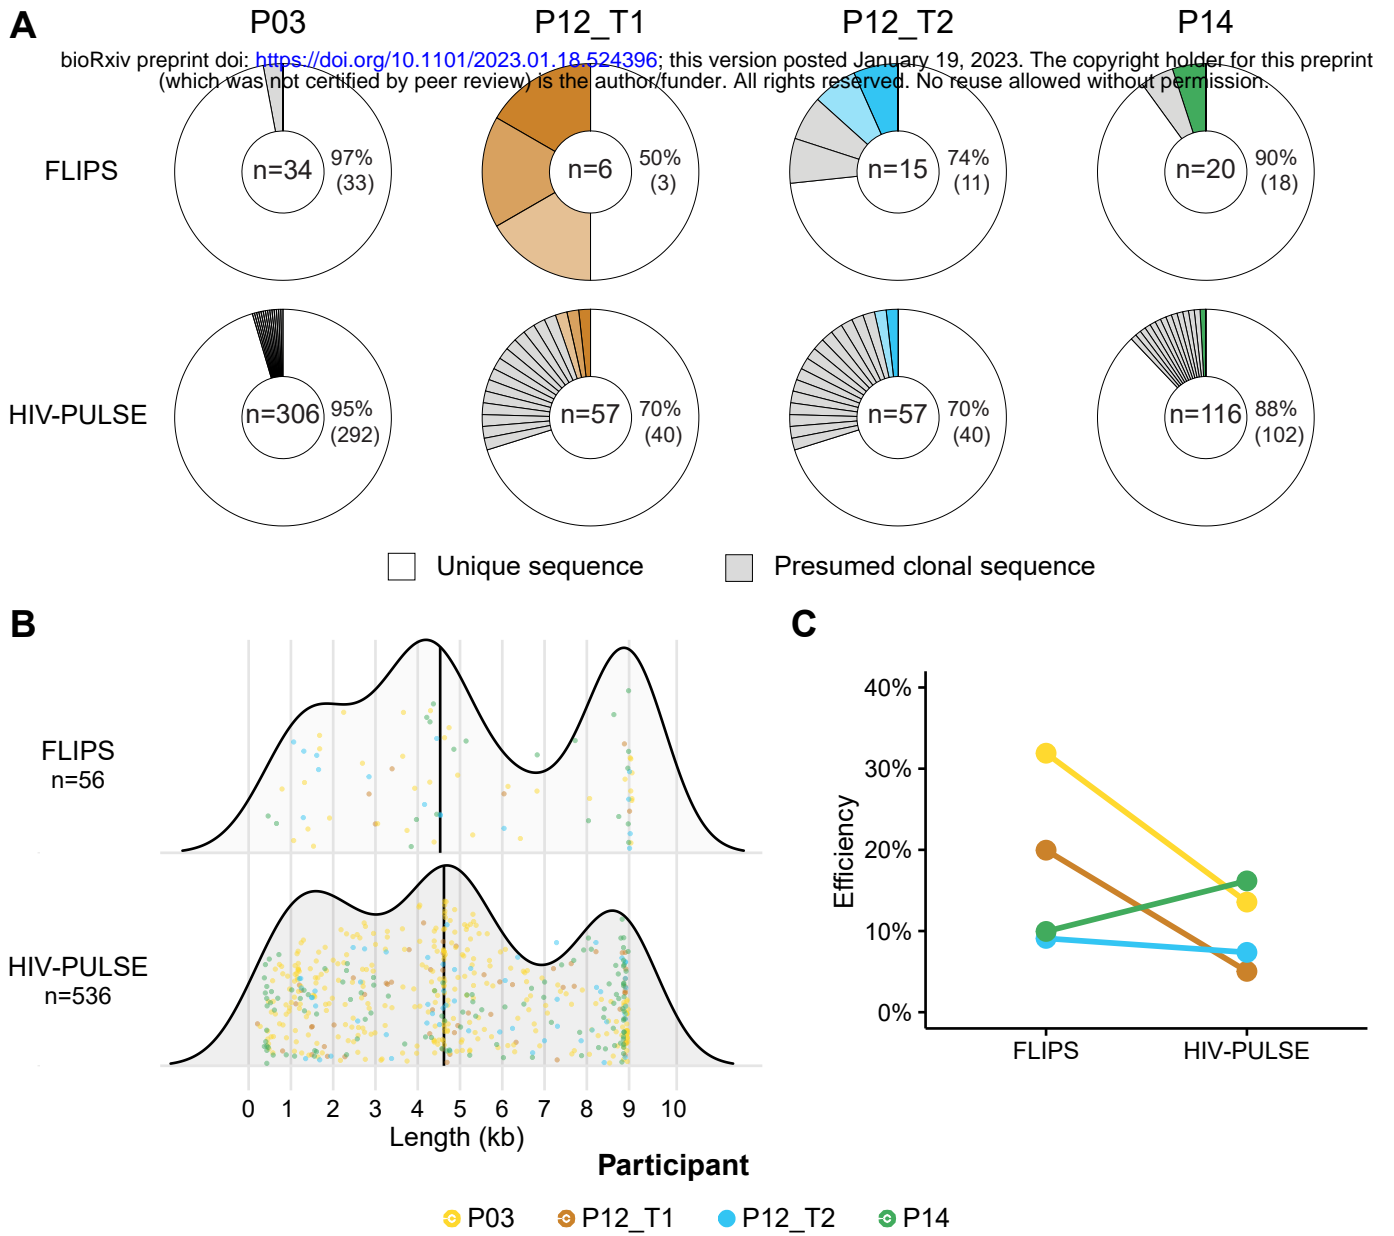

**Figure 3**

**A**

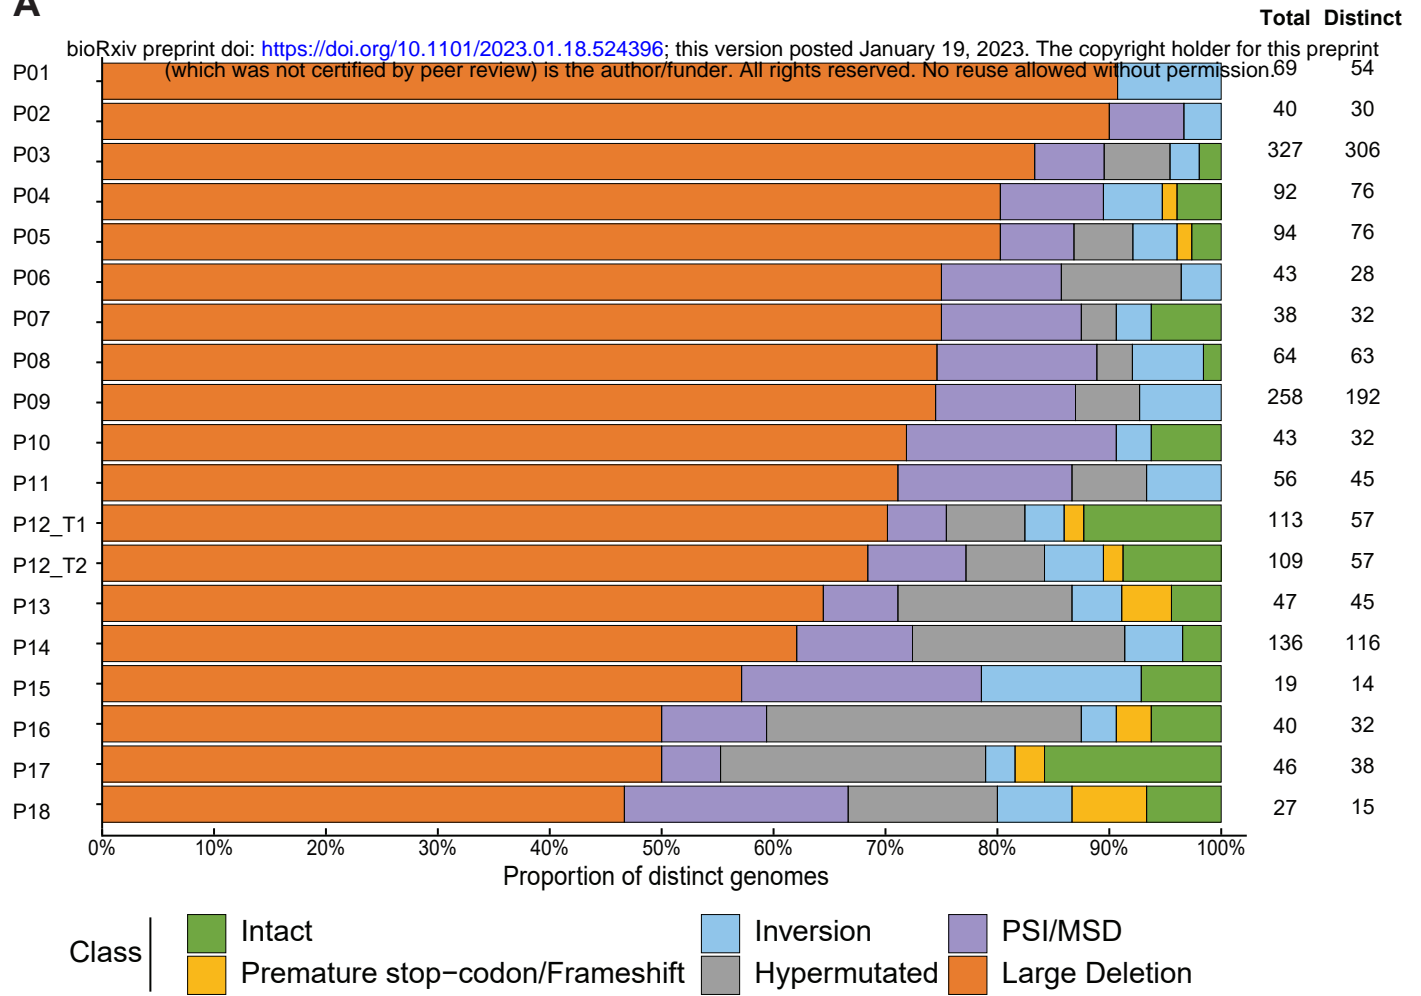

**B**

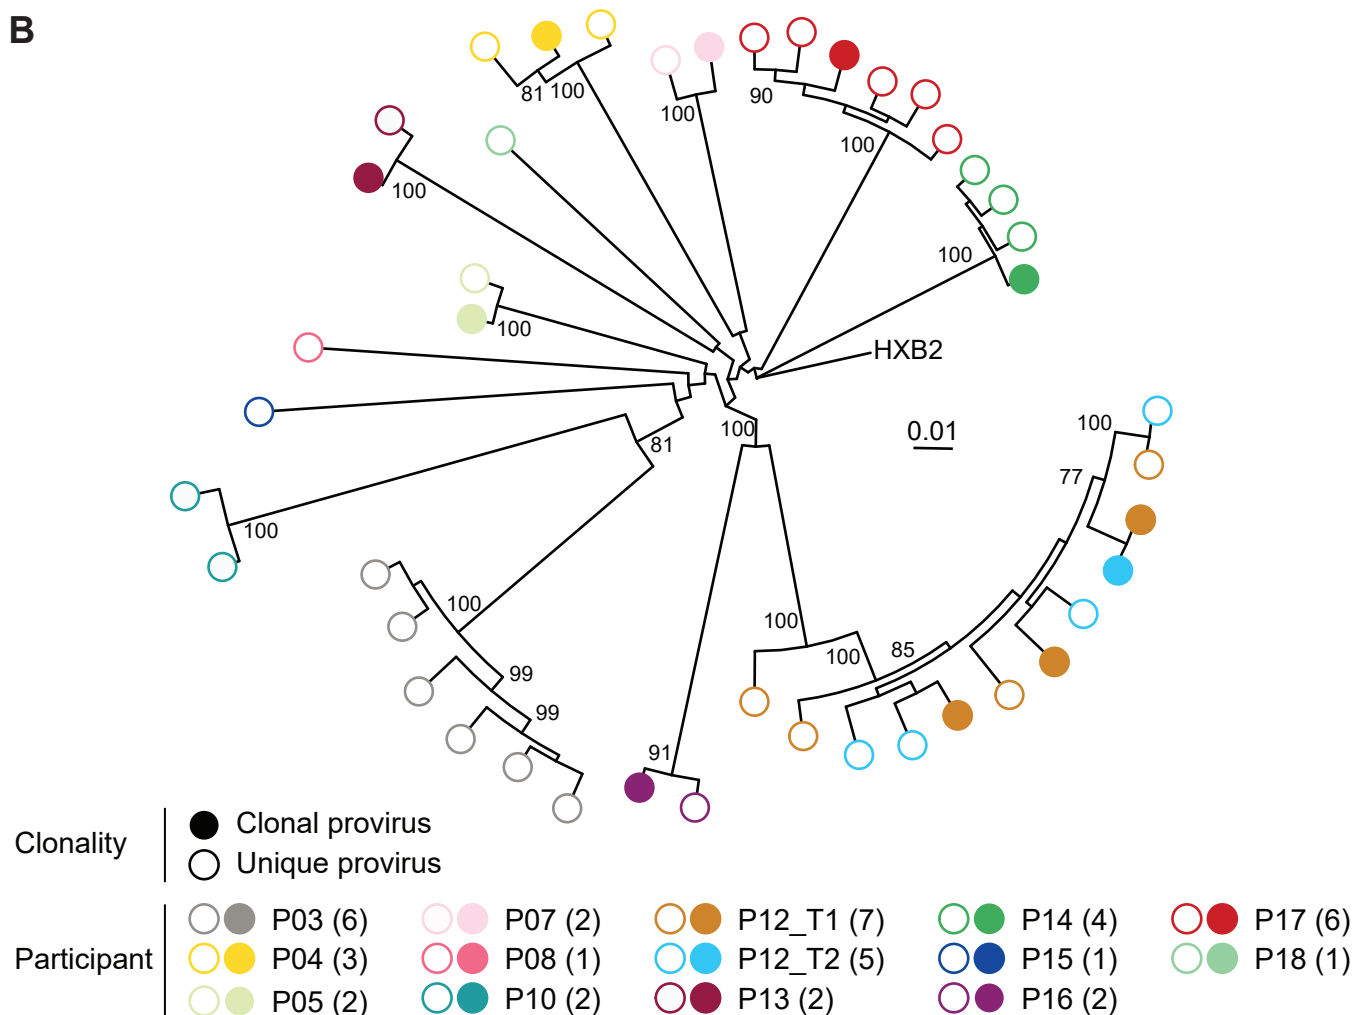

**Figure 4**

**A**

bioRxiv preprint doi: <https://doi.org/10.1101/2023.01.18.524396>; this version posted January 19, 2023. The copyright holder for this preprint (which was not certified by peer review) is the author/funder. All rights reserved. No reuse allowed without permission.

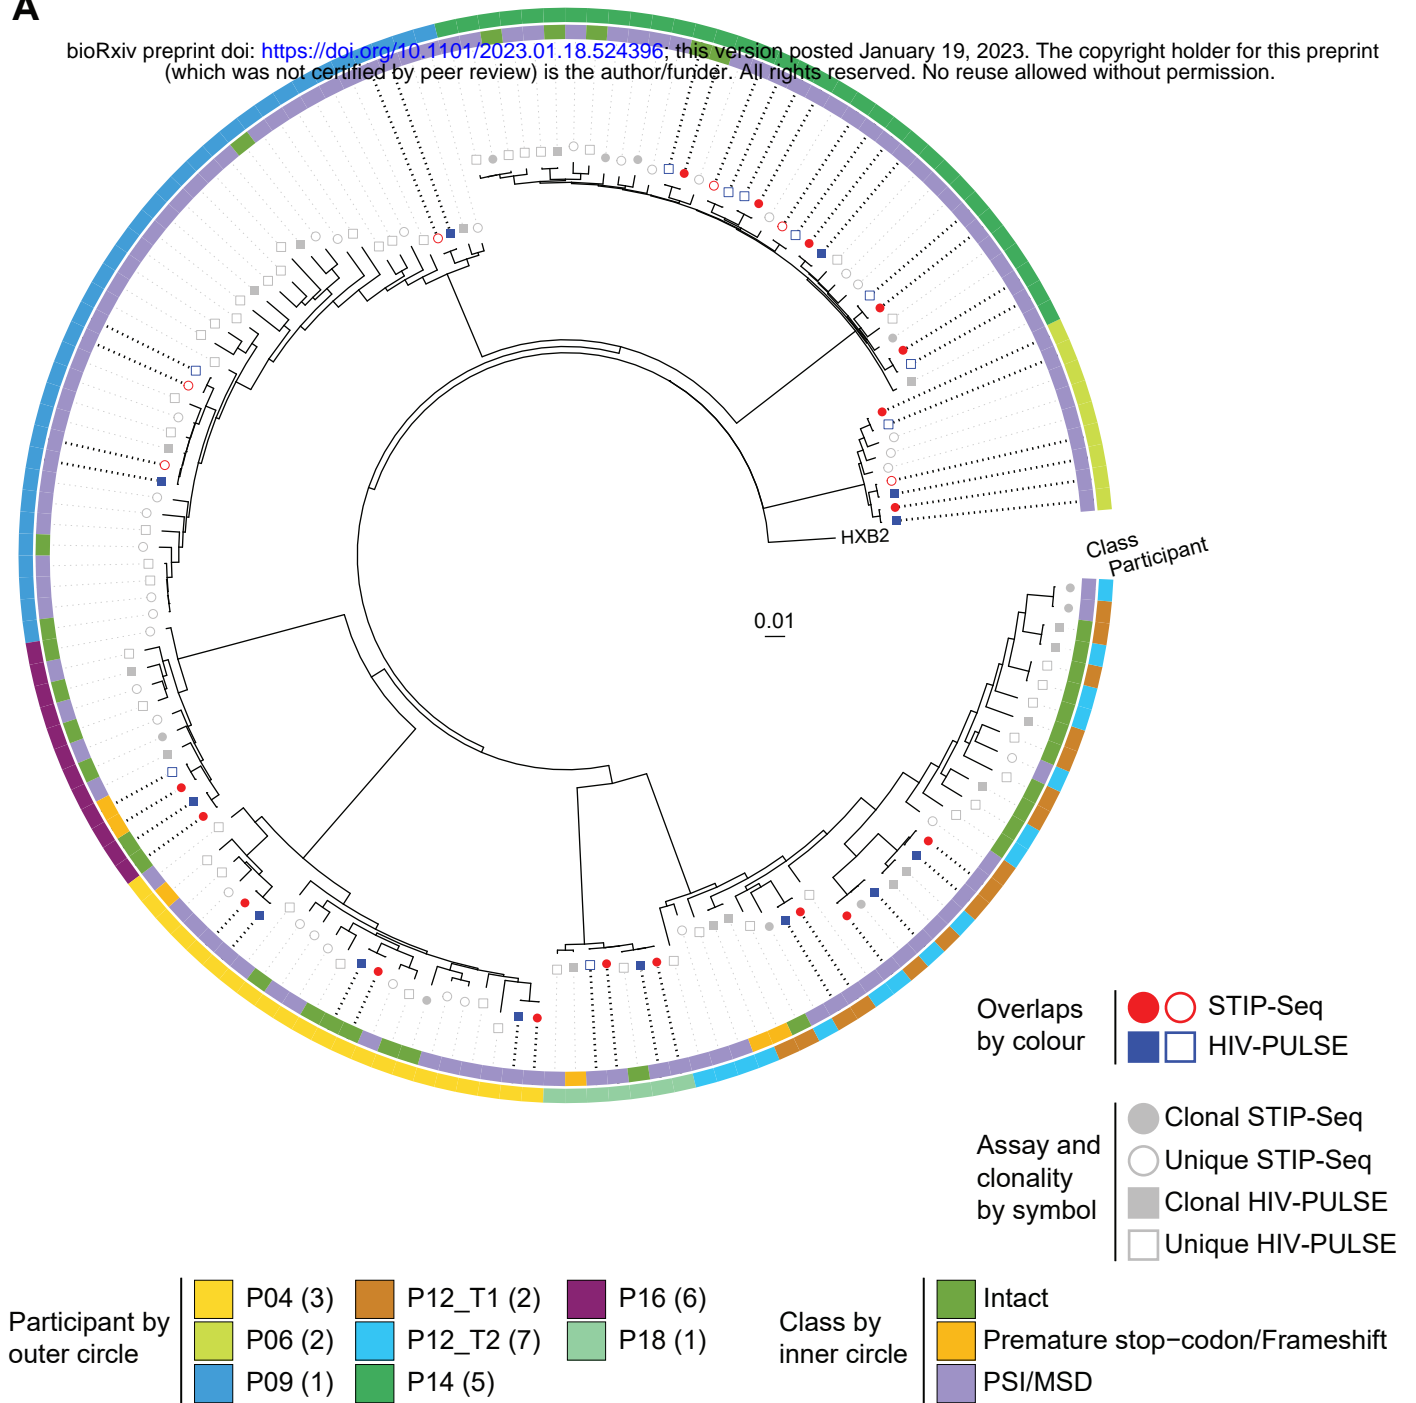

**B**

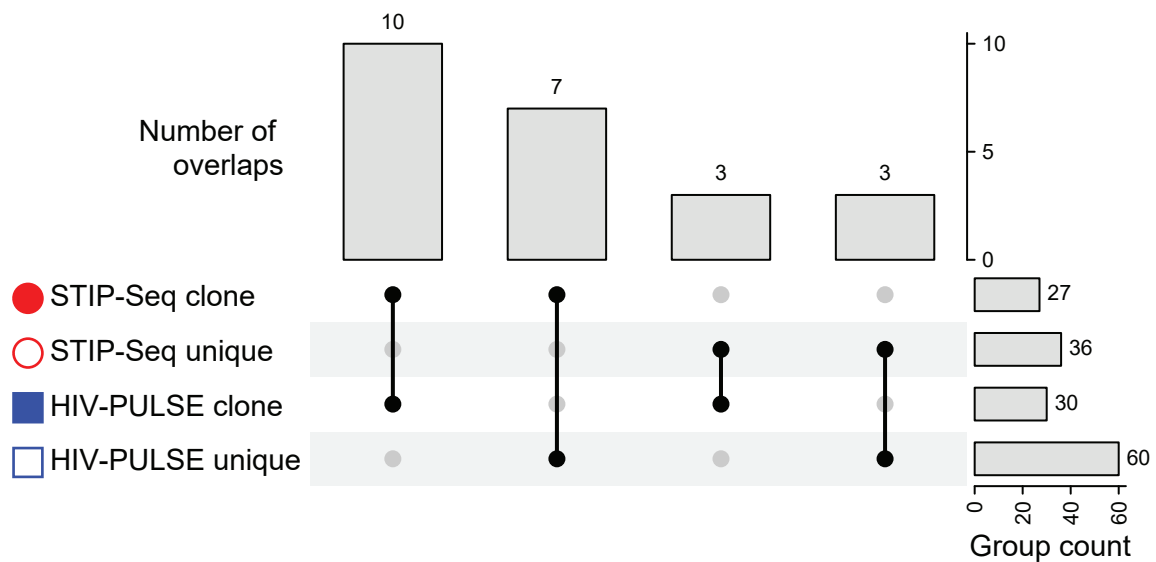

Source: https://www.biorxiv.org/content/10.1101/2023.01.18.524396v1.full.pdf
